# Supplementary material
Source: PubMed Central journal article supplement (PMC5844269)
Supplement: NIHMS937310-supplement-Supplemental.pdf [file NIHMS937310-supplement-Supplemental.pdf]

## Supplementary Online Content

Thomas A, Khan SA, Chrischilles EA, Schroeder MC. Initial surgery and survival in stage IV breast cancer in the United States, 1988-2011. *JAMA Surg*. Published online December 2, 2015. doi:10.1001/jamasurg.2015.4539.

**eFigure 1.** Inclusion and Exclusion Criteria for Patient Population

**eFigure 2.** Kaplan-Meier Survival Curves by Receipt of Surgery

**eTable 1.** Estimates of the Effect of Surgery on Outcomes, Adjusting for the Propensity to Receive Surgery

**eTable 2.** Percent of Women Surviving at Least Ten Years by Receipt of Surgery

**eTable 3.** Characteristics of Women who Survived Ten or More Years Compared with Those who Died within the Median Survival Time (20 Months)

This supplementary material has been provided by the authors to give readers additional information about their work.

**eFigure 1.** Inclusion and Exclusion Criteria for Patient Population

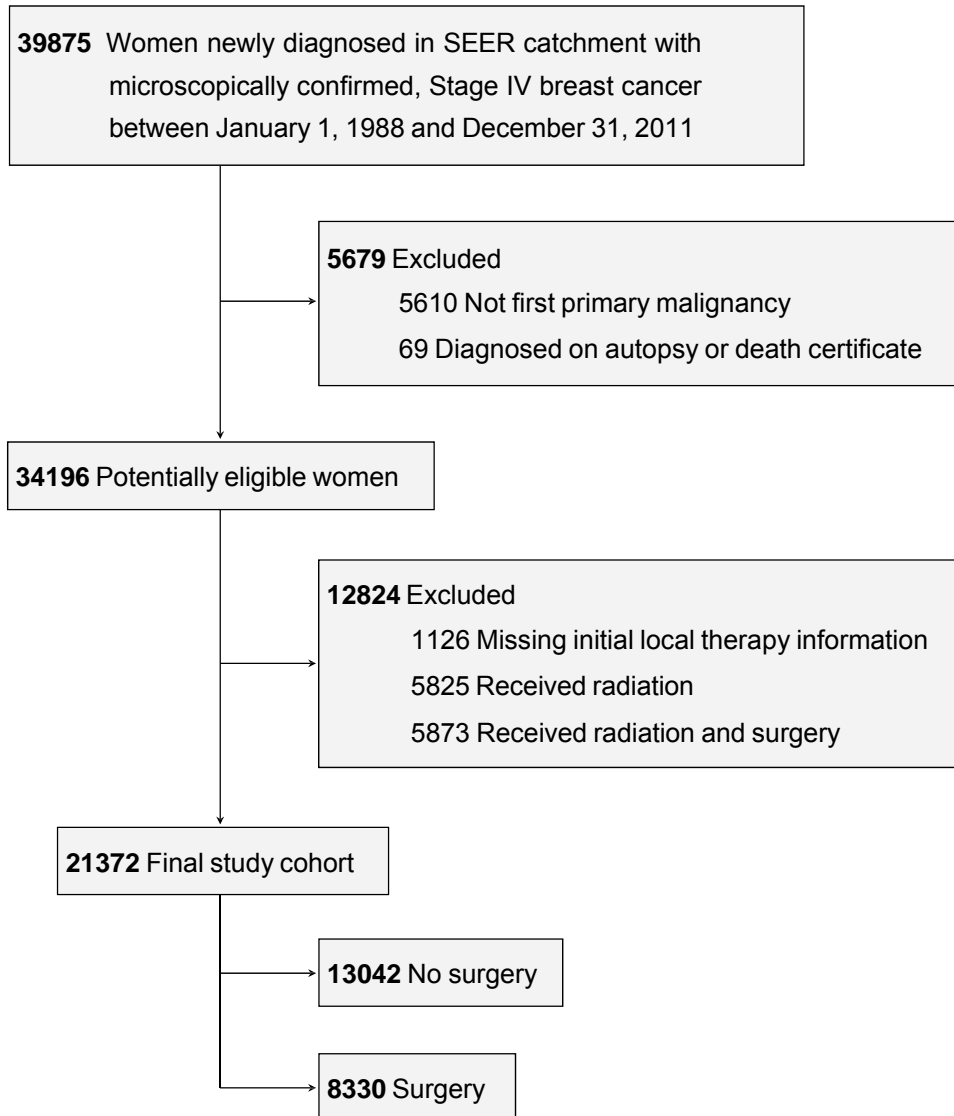

**eFigure 2.** Kaplan-Meier Survival Curves by Receipt of Surgery

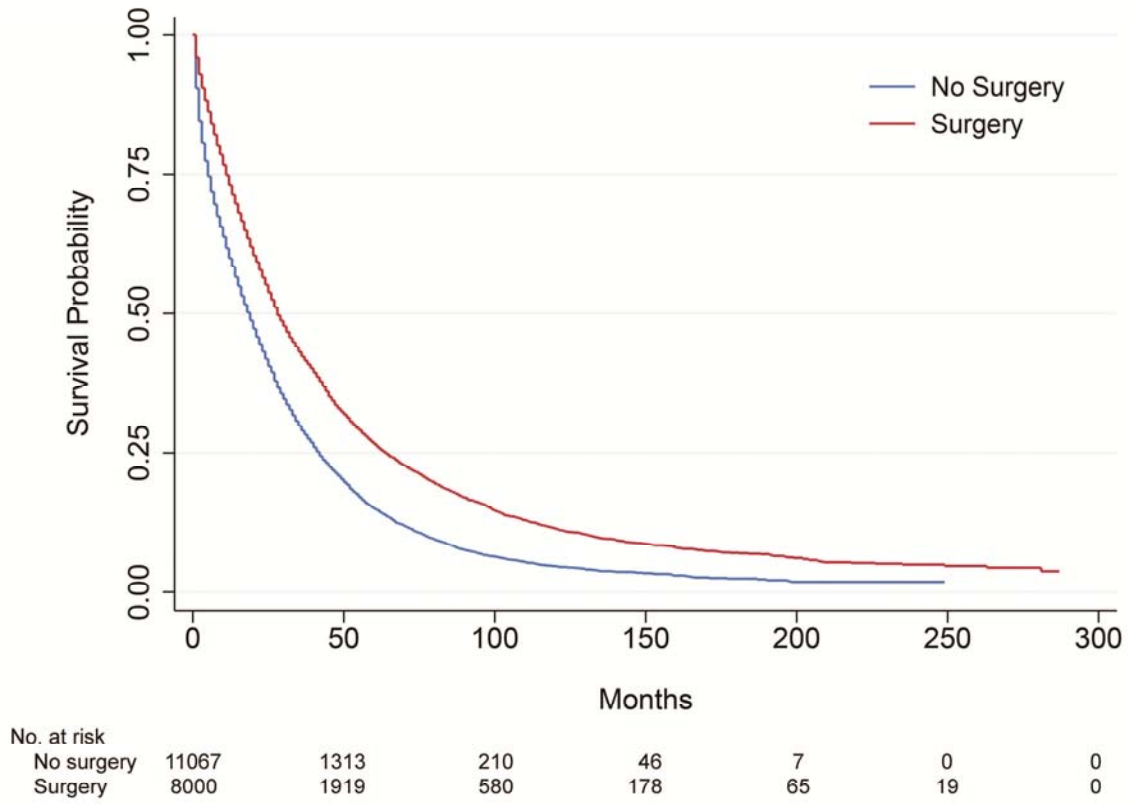

**eTable 1.** Estimates of the Effect of Surgery on Outcomes, Adjusting for the Propensity to Receive Surgery

| Panel A. Royston-Parmar flexible parametric survival model       | HR   | <i>P</i> | 95% CI |      |
|------------------------------------------------------------------|------|----------|--------|------|
| Without propensity adjustment                                    | 0.60 | <0.001   | 0.57   | 0.63 |
| With propensity adjustment, includes no other covariates         | 0.63 | <0.001   | 0.60   | 0.66 |
| With propensity adjustment, includes all other covariates        | 0.60 | <0.001   | 0.57   | 0.63 |
| Panel B. Logistic model of prolonged survival (10 or more years) | OR   | <i>P</i> | 95% CI |      |
| Without propensity adjustment                                    | 2.80 | <0.001   | 2.08   | 3.77 |
| With propensity adjustment, includes no other covariates         | 2.75 | <0.001   | 2.05   | 3.69 |
| With propensity adjustment, includes all other covariates        | 2.76 | <0.001   | 2.05   | 3.72 |

**eTable 2.** Percent of Women Surviving at Least Ten Years by Receipt of Surgery<sup>a</sup>

|                         | Full sample | No surgery | Surgery | OR <sup>b</sup> | 95% CI     |
|-------------------------|-------------|------------|---------|-----------------|------------|
| Full sample             | 6.2         | 2.8        | 9.6     | 3.61            | 2.89-4.50  |
| Age at diagnosis        |             |            |         |                 |            |
| <45                     | 8.3         | 4.9        | 11.0    | 2.39            | 1.34-4.24  |
| 45-64                   | 8.9         | 4.2        | 13.5    | 3.52            | 2.62-4.74  |
| 65+                     | 3.6         | 1.5        | 5.9     | 4.21            | 2.78-6.39  |
| Tumor size              |             |            |         |                 |            |
| ≤2cm                    | 10.6        | 3.8        | 13.4    | 3.94            | 2.13-7.28  |
| >2-5cm                  | 8.0         | 4.0        | 10.0    | 2.64            | 1.73-4.04  |
| >5cm                    | 3.6         | 2.0        | 5.5     | 2.87            | 1.72-4.79  |
| Diagnosis year          |             |            |         |                 |            |
| 1988-1991               | 5.5         | 1.9        | 7.7     | 4.36            | 2.22-8.55  |
| 1992-1996               | 6.4         | 3.4        | 9.4     | 2.91            | 2.00-4.24  |
| 1997-2001               | 6.3         | 2.8        | 10.7    | 4.18            | 3.09-5.66  |
| Marital status          |             |            |         |                 |            |
| Married                 | 8.5         | 4.2        | 12.1    | 3.14            | 2.33-4.24  |
| Single                  | 5.5         | 2.8        | 8.8     | 3.31            | 1.92-5.70  |
| Separated               | 3.9         | 1.4        | 6.8     | 5.17            | 3.20-8.36  |
| Unknown                 | 6.0         | 4.7        | 8.1     | 1.77            | 0.64-4.87  |
| Race                    |             |            |         |                 |            |
| White                   | 6.2         | 3.0        | 9.4     | 3.42            | 2.68-4.37  |
| Black                   | 5.2         | 2.5        | 8.6     | 3.65            | 2.00-6.69  |
| Other                   | 7.8         | 2.4        | 1.4     | 6.48            | 2.44-17.26 |
| Hispanic                |             |            |         |                 |            |
| No                      | 6.2         | 2.8        | 9.6     | 3.74            | 2.97-4.72  |
| Yes                     | 6.2         | 4.1        | 8.4     | 2.14            | 1.01-4.54  |
| Hormone receptor status |             |            |         |                 |            |
| Negative                | 5.0         | 3.2        | 6.4     | 2.03            | 1.13-3.68  |
| Positive                | 8.1         | 3.7        | 11.1    | 3.31            | 2.40-4.57  |
| Unknown                 | 4.7         | 2.2        | 8.7     | 4.24            | 2.95-6.10  |

<sup>a</sup> Sample included women diagnosed before 2002.

<sup>b</sup> Odds of surviving at least ten years by receipt of surgery for a given characteristic compared to those not in this category.

**eTable 3.** Characteristics of Women who Survived Ten or More Years Compared with Those who Died within the Median Survival Time (20 Months)<sup>a</sup>

|                         | Those who died within 20 months | Those who survived 10+ years | OR <sup>b</sup> | 95% CI    |
|-------------------------|---------------------------------|------------------------------|-----------------|-----------|
| Sample Size             | 4,152                           | 460                          |                 |           |
| Local Therapy           |                                 |                              |                 |           |
| No surgery              | 60.04%                          | 23.30%                       | 0.20            | 0.16-0.25 |
| Surgery                 | 39.96%                          | 76.70%                       | 4.96            | 3.96-6.21 |
| Age at diagnosis        |                                 |                              |                 |           |
| <45                     | 9.10%                           | 13.90%                       | 1.61            | 1.21-2.14 |
| 45-64                   | 35.60%                          | 57.00%                       | 2.39            | 1.97-2.91 |
| 65+                     | 55.30%                          | 29.10%                       | 0.33            | 0.27-0.41 |
| Tumor size              |                                 |                              |                 |           |
| ≤2cm                    | 18.82%                          | 32.70%                       | 2.09            | 1.64-2.67 |
| >2-5cm                  | 37.57%                          | 46.10%                       | 1.42            | 1.14-1.78 |
| >5cm                    | 43.60%                          | 21.20%                       | 0.35            | 0.27-0.45 |
| Diagnosis year          |                                 |                              |                 |           |
| 1988-2001               | 18.79%                          | 16.70%                       | 0.87            | 0.67-1.12 |
| 1992-1996               | 31.07%                          | 31.70%                       | 1.03            | 0.84-1.27 |
| 1997-2001               | 50.14%                          | 51.50%                       | 1.06            | 0.87-1.28 |
| Marital status          |                                 |                              |                 |           |
| Married                 | 36.05%                          | 57.40%                       | 2.39            | 1.96-2.90 |
| Single                  | 16.91%                          | 14.60%                       | 0.84            | 0.64-1.10 |
| Separated               | 43.23%                          | 24.60%                       | 0.43            | 0.34-0.53 |
| Unknown                 | 3.81%                           | 3.50%                        | 0.91            | 0.54-1.54 |
| Race                    |                                 |                              |                 |           |
| White                   | 78.38%                          | 81.00%                       | 1.18            | 0.92-1.51 |
| Black                   | 16.38%                          | 12.20%                       | 0.71            | 0.53-0.95 |
| Other Race              | 5.24%                           | 6.80%                        | 1.31            | 0.89-1.94 |
| Hispanic                |                                 |                              |                 |           |
| No                      | 93.32%                          | 93.00%                       | 0.96            | 0.65-1.40 |
| Yes                     | 6.68%                           | 7.00%                        | 1.05            | 0.72-1.53 |
| Hormone receptor status |                                 |                              |                 |           |
| Negative                | 18.86%                          | 12.20%                       | 0.60            | 0.45-0.80 |
| Positive                | 33.43%                          | 55.90%                       | 2.52            | 2.07-3.06 |
| Unknown                 | 47.71%                          | 32.00%                       | 0.51            | 0.42-0.63 |

<sup>a</sup> Sample included women diagnosed before 2002.

<sup>b</sup> Odds of surviving at least 10 years vs dying within 20 months given this characteristic compared to those not in this category.
